# Supplementary material for: Displacement parameters from density-functional theory and their validation in the experimental charge density of tartaric acid
Source: Royal Society of Chemistry journal article supplement (doi:10.1039/d0ce01425g), 2020-12-09

# Displacement Parameters from Density-Functional Theory and their Validation in the Experimental Charge Density of Tartaric Acid

Damian Mroz, Ruimin Wang, Ulli Englert, and Richard Dronskowski

## Supporting Information

### Tables

**Table S1** ADPs for all atoms in **1** in the harmonic and in the quasiharmonic approximation at 100 K (atom numbering according to Fig. S1).

**Table S2** ADPs of all atoms in **1** at 100 K, H atoms with ADPs fixed to the values obtained from the SHADE server (atom numbering according to Fig. S3).

**Table S3** Resolution & completeness statistics (cumulative and Friedel pairs averaged).

**Table S4** *R*-Value statistics as a function of resolution (in resolution shells).

**Table S5** Monopole populations, contraction parameters  $\kappa$  and  $\kappa'$  and net atomic charges.

**Table S6** Bond distances in **1** (Å).

**Table S7** Bond angles in **1** (°).

**Table S8** Hydrogen bond geometry [Å, deg.] in **1**.

**Table S9** Diagonal components *U* of the displacement tensors, sorted from smallest (min), medium (med) to largest (max) for theory and experiment, given in  $10^{-3}$  Å<sup>2</sup>. Similarity indices (*S*<sub>12</sub>) are given in percent.

**Table S10** Topological properties of (3,-1) critical points for hydrogen bonds in **1**.

**Table S11** Topological properties of (3,-1) critical points for covalent bonds in **1**.

## Figures

**Figure S1** Calculated displacement ellipsoids (90%) based on the harmonic approximation and atom numbering for **1** at 100 K.

**Figure S2** Scatter plot of experimental main-axis components of displacement tensors from the independent atom model (IAM) versus experimental results from multipole refinement (MM) at 100 K for **1**. Horizontal and vertical lines correspond to 10 standard uncertainties of the experimental values.

**Figure S3** Displacement ellipsoids and atom numbering for **1** at 100 K (90%). ADPs for H atoms were obtained from the SHADE server (A. Ø. Madsen. SHADE web server for estimation of hydrogen anisotropic displacement parameters. *J. Appl. Cryst.*, 2006, **39**, 757).

**Figure S4** Scatter plots for X-ray refinement result for **1**.

**Figure S5** H bonds in **1**; the Hirshfeld surface shows a molecule of tartaric acid. Surface colours encode the electrostatic potential (red negative, blue positive).

**Figure S6** Gradient trajectory plot, deformation density (contour lines at  $0.1 \text{ e}\text{\AA}^{-3}$ ) and Laplacian (isosurface at  $-2 \text{ e}\text{\AA}^{-5}$ ) of electron density for O2–H2 $\cdots$ O4<sup>i</sup>.

**Figure S7** Gradient trajectory plot, deformation density (contour lines at  $0.1 \text{ e}\text{\AA}^{-3}$ ) and Laplacian (isosurface at  $-2 \text{ e}\text{\AA}^{-5}$ ) of electron density for O3–H3 $\cdots$ O5<sup>ii</sup>.

**Figure S8** Gradient trajectory plot, deformation density (contour lines at  $0.1 \text{ e}\text{\AA}^{-3}$ ) and Laplacian (isosurface at  $-2 \text{ e}\text{\AA}^{-5}$ ) of electron density for O4–H4 $\cdots$ O1<sup>iii</sup>.

**Figure S9** Gradient trajectory plot, deformation density (contour lines at  $0.1 \text{ e}\text{\AA}^{-3}$ ) and Laplacian (isosurface at  $-2 \text{ e}\text{\AA}^{-5}$ ) of electron density for O6–H6 $\cdots$ O1<sup>iv</sup>.

**Figure S10** Gradient trajectory plot, deformation density (contour lines at  $0.1 \text{ e}\text{\AA}^{-3}$ ) and Laplacian (isosurface at  $-2 \text{ e}\text{\AA}^{-5}$ ) of electron density for C3–H3A $\cdots$ O6<sup>v</sup>.

**Figure S11** Normal probability plot for residuals in the electron density in **1**.

**Figure S12** Probability distribution histogram for residuals in the electron density in **1**.

**Figure S13** Fractal dimension plot for residuals in the electron density in **1**.

**Figure S14** PEANUT plots of differences  
ADPs (experiment, MM based) - ADPs (calculated, quasi-harmonic approximation)

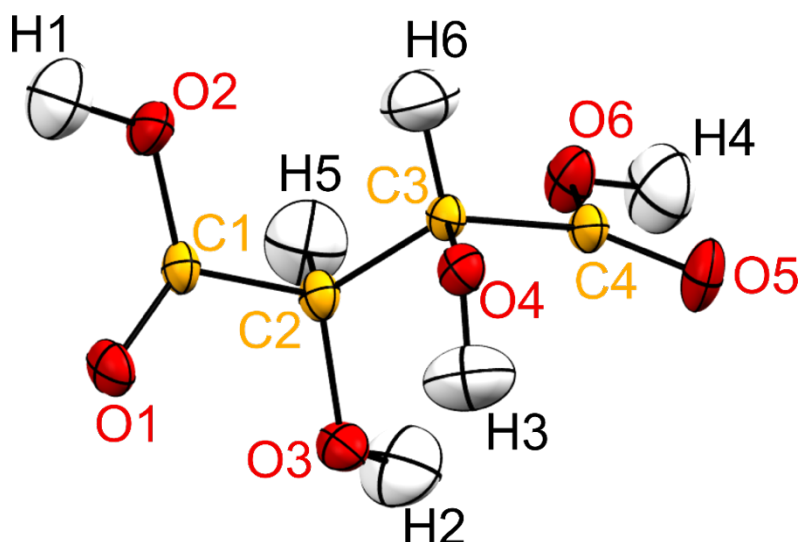

**Figure S1** Calculated displacement ellipsoids (90%) based on the harmonic approximation and atom numbering for **1** at 100 K.

**Table S1** ADPs for all atoms in **1** in the harmonic and in the quasi-harmonic approximation at 100 K (atom numbering according to Fig. S1).

Harmonic approximation

| Atom | $U_{11}$ | $U_{22}$ | $U_{33}$ | $U_{23}$ | $U_{13}$ | $U_{12}$ |
|------|----------|----------|----------|----------|----------|----------|
| O1   | 0.01037  | 0.01326  | 0.005063 | -0.00025 | 0.002246 | -0.00164 |
| O2   | 0.009121 | 0.01485  | 0.007929 | -0.00117 | 0.00351  | 0.001918 |
| O3   | 0.007649 | 0.01294  | 0.007524 | -1.4E-05 | 0.002525 | -0.00212 |
| O4   | 0.008396 | 0.00843  | 0.006653 | 0.000852 | 0.002505 | -0.00063 |
| O5   | 0.017388 | 0.01156  | 0.008864 | -0.00108 | 0.006502 | 0.003125 |
| O6   | 0.015058 | 0.01282  | 0.006134 | 0.00242  | 0.0041   | 0.004064 |
| H1   | 0.020273 | 0.02332  | 0.016926 | -0.00157 | 0.00751  | 0.000822 |
| H2   | 0.019601 | 0.02846  | 0.018897 | 0.003479 | 0.00947  | -0.00292 |
| H3   | 0.014352 | 0.02352  | 0.023653 | 0.004677 | 0.001701 | 0.001917 |
| H4   | 0.02605  | 0.02516  | 0.013062 | 0.002194 | 0.007495 | 0.002656 |
| H5   | 0.02543  | 0.01655  | 0.018606 | 0.005367 | 0.004081 | 0.002247 |
| H6   | 0.011914 | 0.02423  | 0.019983 | 0.000326 | 0.002934 | 0.001594 |
| C1   | 0.008582 | 0.00745  | 0.005231 | -0.00073 | 0.002655 | -0.00045 |
| C2   | 0.008135 | 0.00761  | 0.005082 | -1.9E-05 | 0.002393 | -0.00051 |
| C3   | 0.006622 | 0.00819  | 0.004714 | -0.00031 | 0.001868 | -0.0002  |
| C4   | 0.007524 | 0.00957  | 0.004654 | -0.0004  | 0.001973 | 0.000519 |

## Quasiharmonic approximation

| Atom | $U_{11}$ | $U_{22}$ | $U_{33}$ | $U_{23}$  | $U_{13}$ | $U_{12}$  |
|------|----------|----------|----------|-----------|----------|-----------|
| O1   | 0.011445 | 0.014430 | 0.005261 | -0.000276 | 0.002399 | -0.001567 |
| O2   | 0.009930 | 0.016970 | 0.008307 | -0.001481 | 0.003712 | 0.002023  |
| O3   | 0.008335 | 0.014160 | 0.008005 | 0.000180  | 0.002675 | -0.002139 |
| O4   | 0.009167 | 0.009770 | 0.007051 | 0.000829  | 0.002720 | -0.000873 |
| O5   | 0.019697 | 0.013380 | 0.009277 | -0.000947 | 0.007135 | 0.003920  |
| O6   | 0.016416 | 0.014550 | 0.006369 | 0.002473  | 0.004346 | 0.004521  |
| H1   | 0.021215 | 0.025040 | 0.017209 | -0.001852 | 0.007821 | 0.001012  |
| H2   | 0.020461 | 0.029870 | 0.019682 | 0.003836  | 0.009681 | -0.003332 |
| H3   | 0.015149 | 0.024840 | 0.024701 | 0.004830  | 0.001870 | 0.001871  |
| H4   | 0.027362 | 0.026760 | 0.013170 | 0.002317  | 0.007600 | 0.002916  |
| H5   | 0.026437 | 0.017950 | 0.018991 | 0.005637  | 0.004133 | 0.002404  |
| H6   | 0.012587 | 0.026180 | 0.020296 | 0.000165  | 0.003031 | 0.001637  |
| C1   | 0.009401 | 0.008460 | 0.005434 | -0.000737 | 0.002834 | -0.000433 |
| C2   | 0.008825 | 0.008810 | 0.005279 | 0.000084  | 0.002535 | -0.000469 |
| C3   | 0.007274 | 0.009630 | 0.004917 | -0.000358 | 0.002041 | -0.000239 |
| C4   | 0.008359 | 0.011050 | 0.004874 | -0.000426 | 0.002192 | 0.000627  |

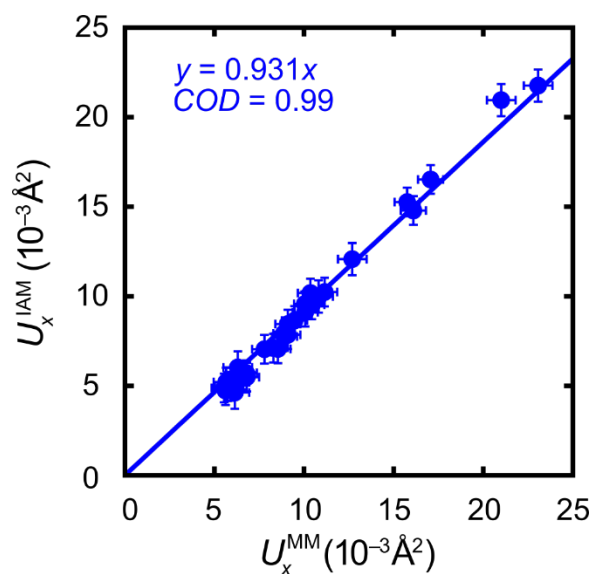

**Figure S2** Scatter plot of experimental main-axis components of displacement tensors from the independent atom model (IAM) versus experimental results from multipole refinement (MM) at 100 K for **1**. Horizontal and vertical lines correspond to 10 standard uncertainties of the experimental values.

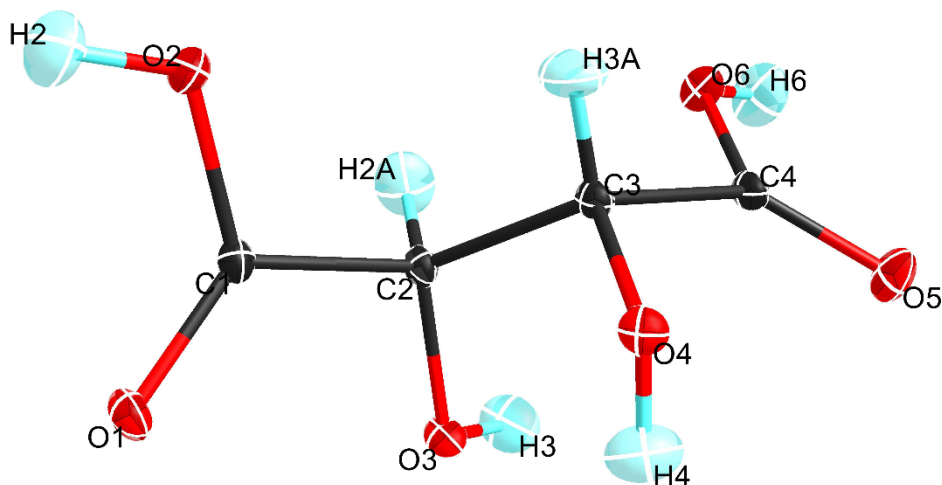

**Figure S3** Displacement ellipsoids and atom numbering for **1** at 100 K (90%). ADPs for H atoms were obtained from the SHADE server (A. Ø. Madsen. SHADE web server for estimation of hydrogen anisotropic displacement parameters. *J. Appl. Cryst.*, 2006, **39**, 757).

**Table S2** ADPs of all atoms in **1** at 100 K, H atoms with ADPs fixed to the values obtained from the SHADE server (atom numbering according to Fig. S3).

| Atom | $U_{11}$    | $U_{22}$    | $U_{33}$    | $U_{23}$     | $U_{13}$    | $U_{12}$     |
|------|-------------|-------------|-------------|--------------|-------------|--------------|
| O1   | 0.01009(14) | 0.01437(16) | 0.00518(12) | -0.00036(13) | 0.00162(10) | -0.00159(14) |
| O2   | 0.00818(13) | 0.01546(17) | 0.00854(14) | -0.00176(12) | 0.00329(11) | 0.00177(13)  |
| O3   | 0.00690(13) | 0.01397(17) | 0.00824(14) | -0.00023(12) | 0.00246(10) | -0.00226(13) |
| O4   | 0.00763(13) | 0.00848(13) | 0.00702(13) | 0.00145(11)  | 0.00174(10) | -0.00040(12) |
| O5   | 0.01829(19) | 0.01317(17) | 0.00959(16) | -0.00053(14) | 0.00632(13) | 0.00596(17)  |
| O6   | 0.01558(18) | 0.01423(17) | 0.00621(14) | 0.00311(13)  | 0.00392(12) | 0.00515(15)  |
| C1   | 0.00779(14) | 0.00854(15) | 0.00591(13) | -0.00093(11) | 0.00212(10) | -0.00043(12) |
| C2   | 0.00782(13) | 0.00785(13) | 0.00555(13) | -0.00001(11) | 0.00202(9)  | -0.00053(12) |
| C3   | 0.00679(13) | 0.00817(14) | 0.00506(13) | -0.00006(11) | 0.00134(9)  | -0.00014(11) |
| C4   | 0.00850(14) | 0.00984(15) | 0.00508(14) | -0.00031(12) | 0.00188(10) | 0.00106(13)  |
| H2   | 0.02073     | 0.02073     | 0.02073     | 0.00000      | 0.00375     | 0.00000      |
| H2A  | 0.03390     | 0.03390     | 0.03390     | 0.00000      | 0.00614     | 0.00000      |
| H3   | 0.01811     | 0.01811     | 0.01811     | 0.00000      | 0.00328     | 0.00000      |
| H3A  | 0.01038     | 0.01038     | 0.01038     | 0.00000      | 0.00188     | 0.00000      |
| H4   | 0.01495     | 0.01495     | 0.01495     | 0.00000      | 0.00271     | 0.00000      |
| H6   | 0.03424     | 0.03424     | 0.03424     | 0.00000      | 0.00620     | 0.00000      |

**Table S3** Resolution & completeness statistics (cumulative and Friedel pairs averaged)

| $\theta$ | $\sin\theta/\lambda$ | Complete | Expected | Measured | Missing |
|----------|----------------------|----------|----------|----------|---------|
| 20.82    | 0.500                | 1.000    | 328      | 328      | 0       |
| 23.01    | 0.550                | 1.000    | 437      | 437      | 0       |
| 25.24    | 0.600                | 1.000    | 554      | 554      | 0       |
| 27.51    | 0.650                | 1.000    | 697      | 697      | 0       |
| 29.84    | 0.700                | 1.000    | 864      | 864      | 0       |
| 32.21    | 0.750                | 1.000    | 1060     | 1060     | 0       |
| 34.65    | 0.800                | 1.000    | 1286     | 1286     | 0       |
| 37.17    | 0.850                | 1.000    | 1533     | 1533     | 0       |
| 39.77    | 0.900                | 1.000    | 1809     | 1809     | 0       |
| 42.47    | 0.950                | 1.000    | 2130     | 2130     | 0       |
| 45.29    | 1.000                | 1.000    | 2475     | 2475     | 0       |
| 48.27    | 1.050                | 1.000    | 2847     | 2847     | 0       |
| 51.43    | 1.100                | 0.998    | 3266     | 3261     | 5       |
| 54.52    | 1.146                | 0.978    | 3694     | 3611     | 83      |

The reported completeness refers to the actual  $h,k,l$  index range

**Table S4**  $R$ -Value statistics as a function of resolution (in resolution shells).

| $\theta$ | $\sin\theta/\lambda$ | #    | $R_1$ | $wR_2$ | $S$   | $R_\sigma$ | $av(I/SigW)$ | $av(I)$ | $av(SigW)$ |
|----------|----------------------|------|-------|--------|-------|------------|--------------|---------|------------|
| 12.38    | 0.302                | 127  | 0.046 | 0.127  | 2.694 | 0.021      | 21.03        | 405.44  | 19.80      |
| 15.68    | 0.380                | 128  | 0.037 | 0.081  | 1.631 | 0.019      | 19.81        | 141.34  | 6.67       |
| 18.02    | 0.435                | 135  | 0.025 | 0.083  | 1.599 | 0.019      | 18.96        | 124.41  | 6.07       |
| 19.90    | 0.479                | 116  | 0.025 | 0.097  | 1.790 | 0.020      | 18.36        | 93.69   | 4.74       |
| 21.51    | 0.516                | 124  | 0.030 | 0.100  | 1.760 | 0.023      | 17.08        | 60.37   | 3.15       |
| 22.94    | 0.548                | 145  | 0.034 | 0.095  | 1.607 | 0.027      | 16.53        | 44.67   | 2.46       |
| 24.22    | 0.577                | 118  | 0.028 | 0.078  | 1.291 | 0.026      | 16.09        | 40.87   | 2.22       |
| 25.40    | 0.603                | 128  | 0.027 | 0.083  | 1.388 | 0.025      | 16.22        | 33.26   | 1.80       |
| 26.49    | 0.628                | 137  | 0.024 | 0.064  | 1.083 | 0.022      | 16.46        | 33.68   | 1.74       |
| 27.52    | 0.650                | 113  | 0.022 | 0.066  | 1.056 | 0.025      | 15.34        | 22.74   | 1.23       |
| 28.49    | 0.671                | 126  | 0.020 | 0.057  | 0.997 | 0.023      | 17.07        | 32.41   | 1.70       |
| 29.41    | 0.691                | 140  | 0.023 | 0.065  | 1.068 | 0.028      | 15.91        | 21.76   | 1.21       |
| 30.28    | 0.709                | 118  | 0.024 | 0.069  | 1.045 | 0.034      | 14.49        | 19.92   | 1.18       |
| 31.12    | 0.727                | 124  | 0.022 | 0.061  | 0.889 | 0.038      | 13.89        | 23.87   | 1.47       |
| 31.93    | 0.744                | 112  | 0.023 | 0.062  | 0.870 | 0.038      | 13.09        | 22.85   | 1.42       |
| 32.71    | 0.760                | 132  | 0.024 | 0.062  | 0.896 | 0.040      | 13.77        | 22.55   | 1.43       |
| 33.46    | 0.776                | 116  | 0.022 | 0.057  | 0.831 | 0.040      | 14.03        | 21.40   | 1.35       |
| 34.20    | 0.791                | 123  | 0.025 | 0.062  | 0.821 | 0.047      | 12.38        | 17.89   | 1.22       |
| 34.91    | 0.805                | 129  | 0.027 | 0.066  | 0.863 | 0.050      | 12.15        | 14.96   | 1.05       |
| 54.52    | 1.146                | 3756 | 0.044 | 0.101  | 0.915 | 0.083      | 7.84         | 8.11    | 0.80       |

overall  $R_\sigma = \Sigma(\sigma(I)) / \Sigma(I) = 0.0335$

## Refinement

The final MM comprised multipoles up to hexadecapoles for non-H atoms and up to bond-directed dipoles for the H (C-H) atoms, quadrupoles for the H (O-H) atoms. Positional parameters of H atoms were refined freely in a step-wise approach, and their ADPs were fixed to the results obtained from theory in the harmonic approximation.

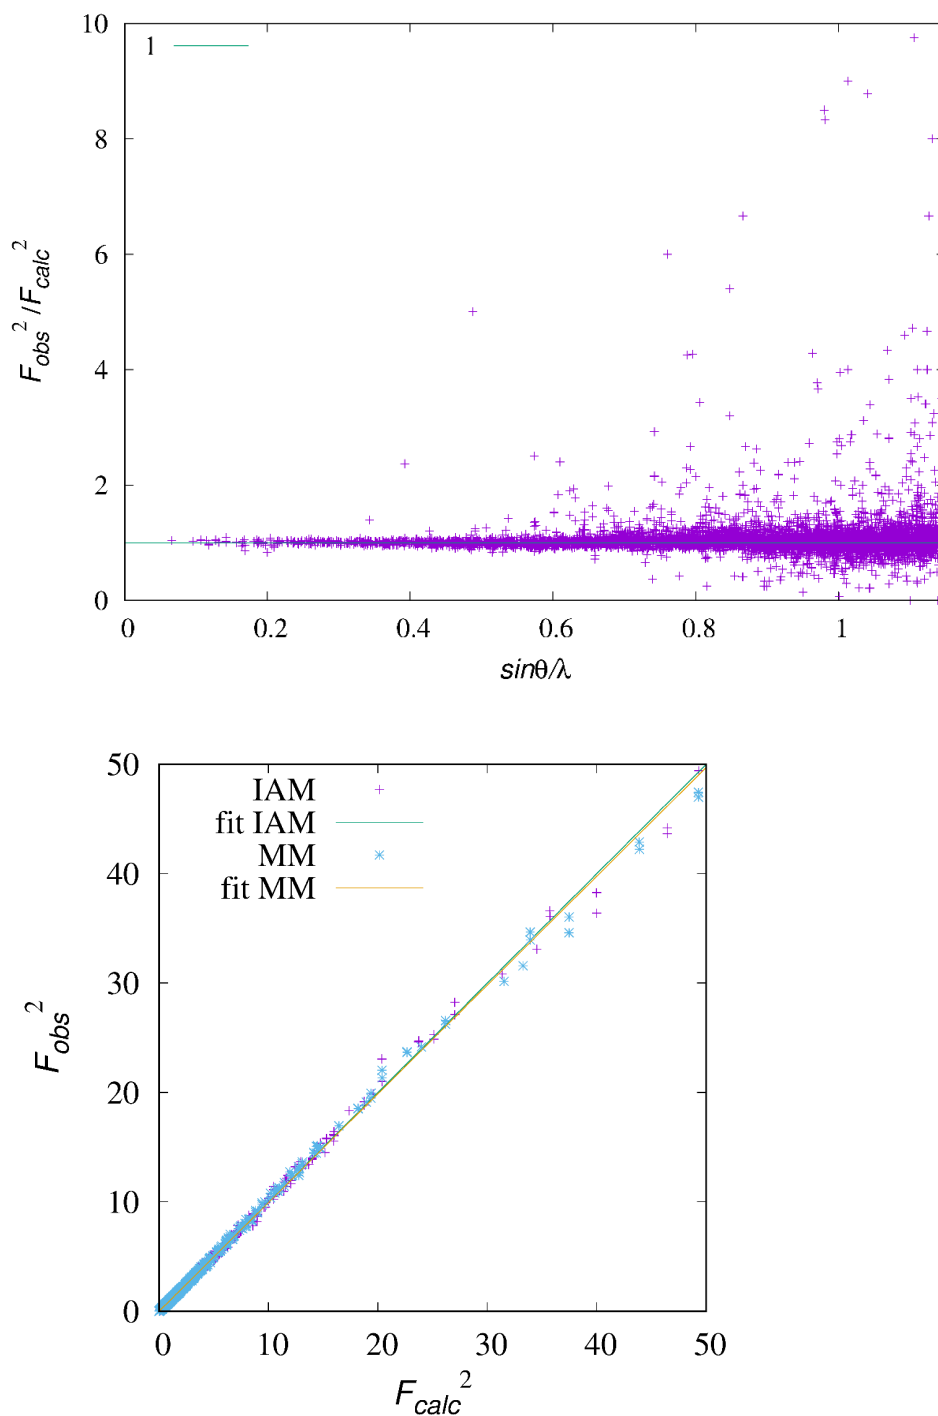

**Figure S4** Scatter plots of X-ray refinement results (MM) for **1**.

**Table S5** Monopole populations, contraction parameters  $\kappa$  and  $\kappa'$  and net atomic charges.

| Atom  | Pval    | $\kappa$ | P00   | $\kappa'$ | Net charge |
|-------|---------|----------|-------|-----------|------------|
| O(1)  | 6.18(5) | 0.984(3) | 0.000 | 1.04(4)   | -0.18(5)   |
| O(2)  | 6.27(5) | 0.984(3) | 0.000 | 1.04(4)   | -0.27(5)   |
| O(3)  | 6.41(5) | 0.979(3) | 0.000 | 1.12(4)   | -0.41(5)   |
| O(4)  | 6.34(5) | 0.979(3) | 0.000 | 1.12(4)   | -0.34(5)   |
| O(5)  | 6.25(6) | 0.984(3) | 0.000 | 1.04(4)   | -0.25(6)   |
| O(6)  | 6.19(5) | 0.984(3) | 0.000 | 1.04(4)   | -0.19(5)   |
| C(1)  | 4.27(9) | 0.974(7) | 0.000 | 0.81(2)   | -0.27(9)   |
| C(2)  | 4.23(9) | 0.979(6) | 0.000 | 0.85(2)   | -0.23(9)   |
| C(3)  | 4.13(9) | 0.979(6) | 0.000 | 0.85(2)   | -0.13(9)   |
| C(4)  | 4.17(9) | 0.974(7) | 0.000 | 0.81(2)   | -0.17(9)   |
| H(2)  | 0.57(3) | 1.34(3)  | 0.000 | 1.500     | +0.43(3)   |
| H(3)  | 0.59(3) | 1.34(3)  | 0.000 | 1.500     | +0.41(3)   |
| H(4)  | 0.68(4) | 1.34(3)  | 0.000 | 1.500     | +0.32(4)   |
| H(6)  | 0.59(4) | 1.34(3)  | 0.000 | 1.500     | +0.41(4)   |
| H(2A) | 0.56(4) | 1.34(3)  | 0.000 | 1.500     | +0.44(4)   |
| H(3A) | 0.57(4) | 1.34(3)  | 0.000 | 1.500     | +0.43(4)   |

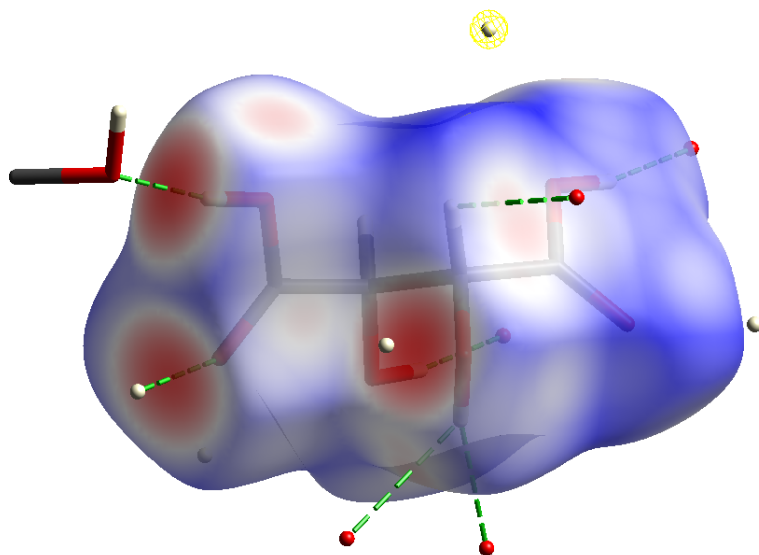

**Figure S5** H bonds in **1**; the Hirshfeld surface shows a molecule of tartaric acid. Surface colours encode the electrostatic potential (red negative, blue positive).



**Table S6** Bond distances in **1** (Å).

|       |           |        |           |
|-------|-----------|--------|-----------|
| O1-C1 | 1.2185(4) | O4-H4  | 0.977(7)  |
| O2-C1 | 1.3131(4) | O6-H6  | 0.987(8)  |
| O3-C2 | 1.3993(4) | C1-C2  | 1.5186(4) |
| O4-C3 | 1.4101(5) | C2-C3  | 1.5456(5) |
| O5-C4 | 1.2103(5) | C3-C4  | 1.5211(4) |
| O6-C4 | 1.3183(5) | C2-H2A | 1.083(10) |
| O2-H2 | 0.982(9)  | C3-H3A | 1.085(9)  |
| O3-H3 | 0.979(7)  |        |           |

**Table S7** Bond angles in **1** (°).

|          |           |           |           |
|----------|-----------|-----------|-----------|
| C1-O2-H2 | 115.4(5)  | O4-C3-C4  | 112.14(3) |
| C2-O3-H3 | 107.4(4)  | C2-C3-C4  | 110.59(3) |
| C3-O4-H4 | 109.7(5)  | O5-C4-C3  | 124.46(3) |
| C4-O6-H6 | 113.4(5)  | O6-C4-C3  | 109.80(3) |
| O1-C1-C2 | 123.47(3) | O5-C4-O6  | 125.73(3) |
| O2-C1-C2 | 111.18(3) | O3-C2-H2A | 112.5(5)  |
| O1-C1-O2 | 125.31(3) | C1-C2-H2A | 108.5(5)  |
| O3-C2-C1 | 108.70(2) | C3-C2-H2A | 109.2(5)  |
| O3-C2-C3 | 111.08(3) | O4-C3-H3A | 106.8(5)  |
| C1-C2-C3 | 106.66(3) | C2-C3-H3A | 109.9(5)  |
| O4-C3-C2 | 110.99(3) | C4-C3-H3A | 106.3(4)  |

**Table S8** Hydrogen bond geometry [Å, deg.] in **1**.

| D(onor) | Hydrogen | A(acceptor)       | D-H      | H...A     | D...A     | D-H...A  |
|---------|----------|-------------------|----------|-----------|-----------|----------|
| O2      | H2       | O4 <sup>i</sup>   | 0.979(9) | 1.640(9)  | 2.6163(4) | 174.8(8) |
| O3      | H3       | O5 <sup>ii</sup>  | 0.980(8) | 1.836(8)  | 2.8107(4) | 173.0(7) |
| O4      | H4       | O1 <sup>iii</sup> | 0.976(7) | 1.905(8)  | 2.8579(4) | 164.7(7) |
| O6      | H6       | O1 <sup>iv</sup>  | 0.982(8) | 1.712(8)  | 2.6781(4) | 167.2(8) |
| C3      | H3A      | O6 <sup>v</sup>   | 1.083(9) | 2.497(10) | 3.0607(5) | 111.2(7) |

Symmetry operators:  $i = 2-x, y-0.5, 1-z$   
 $ii = 1-x, y-0.5, 2-z$   
 $iii = 1-x, y+0.5, 1-z$   
 $iv = x, y, 1+z$   
 $v = 2-x, y+0.5, 2-z$

**Table S9** Diagonal components  $U$  of the displacement tensors, sorted from smallest (min), medium (med) to largest (max) for theory and experiment, given in  $10^{-3} \text{ \AA}^2$ . Similarity indices ( $S_{12}$ ) are given in percent.

| Atom | Theory    |           |           | Experiment |           |           | $S_{12}$ |
|------|-----------|-----------|-----------|------------|-----------|-----------|----------|
|      | $U_{min}$ | $U_{med}$ | $U_{max}$ | $U_{min}$  | $U_{med}$ | $U_{max}$ |          |
| O1   | 4.704     | 9.664     | 14.002    | 4.959      | 10.178    | 14.783    | 0.196    |
| O2   | 5.425     | 10.206    | 15.539    | 5.600      | 9.515     | 16.519    | 0.168    |
| O3   | 5.743     | 8.253     | 13.684    | 5.482      | 8.443     | 15.258    | 0.366    |
| O4   | 5.375     | 8.635     | 9.040     | 5.716      | 7.928     | 9.567     | 0.293    |
| O5   | 5.175     | 11.780    | 19.334    | 6.026      | 12.068    | 21.760    | 0.661    |
| O6   | 4.901     | 9.770     | 18.529    | 4.617      | 9.985     | 20.946    | 0.220    |
| C1   | 4.298     | 7.312     | 9.131     | 5.207      | 7.058     | 9.106     | 0.386    |
| C2   | 4.368     | 7.399     | 8.613     | 4.958      | 7.102     | 8.644     | 0.186    |
| C3   | 4.177     | 6.780     | 8.253     | 4.728      | 7.038     | 7.845     | 0.276    |
| C4   | 4.130     | 7.574     | 9.716     | 4.877      | 7.746     | 10.231    | 0.303    |

**Table S10** Topological properties of (3,-1) critical points for hydrogen bonds in **1**.

$d_1$  ( $d_2$ ) is the distance from the first (second) atom to the (3, -1) critical point,  $R_{ij} = d_1 + d_2$ ,  $\rho$  is the electron density,  $\nabla^2\rho$  is the Laplacian of the electron density.  $G(a.u.)$  is the kinetic energy density,  $V(a.u.)$  the potential energy density and  $E(a.u.)$  the total energy density.

| Bond                   | $R_{ij}(\text{\AA})$ | $d_1(\text{\AA})$ | $\rho(e\cdot\text{\AA}^{-3})$ | $\nabla^2\rho(e\cdot\text{\AA}^{-5})$ | $G(a.u.)$  | $V(a.u.)$   | $E(a.u.)$  |
|------------------------|----------------------|-------------------|-------------------------------|---------------------------------------|------------|-------------|------------|
| H2...O4 <sup>i</sup>   | 1.6428               | 0.5353            | 0.34(9)                       | 1.2(3)                                | 0.028(5)   | -0.044(7)   | -0.016(9)  |
| H3...O5 <sup>ii</sup>  | 1.8480               | 0.6242            | 0.18(9)                       | 0.8(2)                                | 0.012(5)   | -0.016(6)   | -0.004(8)  |
| H4...O1 <sup>iii</sup> | 1.9086               | 0.6856            | 0.17(7)                       | 1.5(2)                                | 0.016(4)   | -0.017(5)   | -0.001(6)  |
| H6...O1 <sup>iv</sup>  | 1.7186               | 0.5604            | 0.26(9)                       | 1.1(3)                                | 0.020(5)   | -0.029(6)   | -0.008(8)  |
| H3A...O6 <sup>v</sup>  | 2.5093               | 1.1028            | 0.064(3)                      | 0.88(3)                               | 0.0073(12) | -0.0055(11) | 0.0018(16) |

i=2-x, y-0.5, 1-z; ii=1-x, y-0.5, 2-z; iii=1-x, y+0.5, 1-z; iv=x, y, 1+z; v=2-x, y+0.5, 2-z

| contact                                      | D...A [Å] | D-H [Å]  | H...A [Å] | <O2-H2...O4 <sup>i</sup> | $\rho$ [eÅ <sup>-3</sup> ] |
|----------------------------------------------|-----------|----------|-----------|--------------------------|----------------------------|
| O2-H2...O4 <sup>i</sup><br>i=2-x, y-0.5, 1-z | 2.6163(4) | 0.979(9) | 1.640(9)  | 174.8(8)                 | 0.34(11)                   |

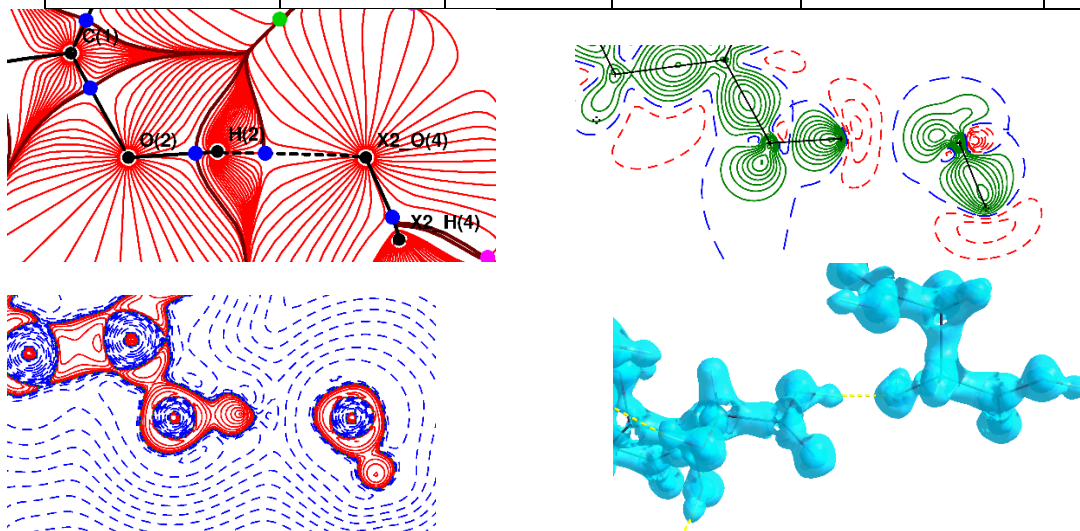

**Figure S6** Gradient trajectory plot, deformation density (contour lines at 0.1 eÅ<sup>-3</sup>) and Laplacian (isosurface at -2 eÅ<sup>-5</sup>) of electron density for O2-H2...O4<sup>i</sup>.

| contact                                        | D...A [Å] | D-H [Å]  | H...A [Å] | <O2-H2...O4 <sup>i</sup> | $\rho$ [eÅ <sup>-3</sup> ] |
|------------------------------------------------|-----------|----------|-----------|--------------------------|----------------------------|
| O3-H3...O5 <sup>ii</sup><br>ii=1-x, y-0.5, 2-z | 2.8107(4) | 0.980(8) | 1.836(8)  | 173.0(7)                 | 0.18(9)                    |

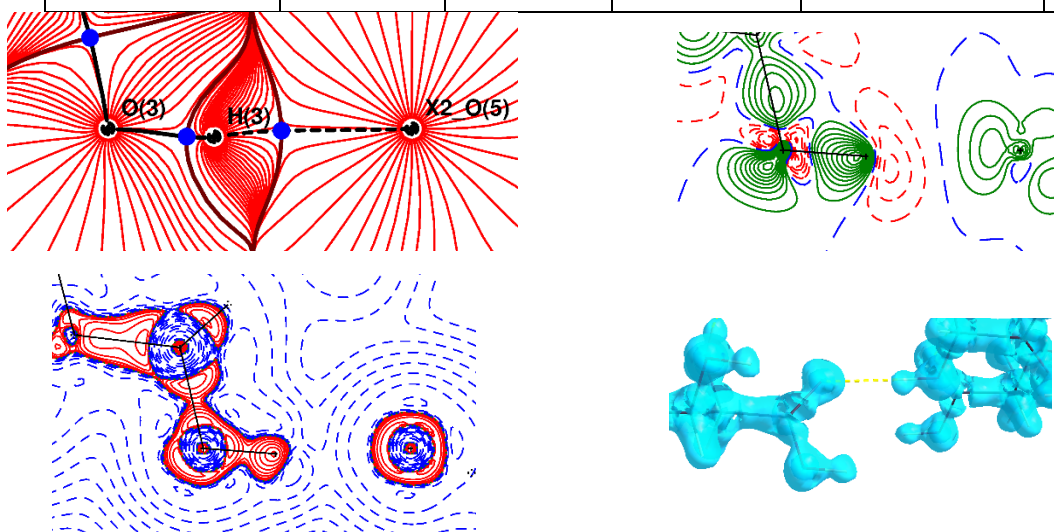

**Figure S7** Gradient trajectory plot, deformation density (contour lines at 0.1 eÅ<sup>-3</sup>) and Laplacian (isosurface at -2 eÅ<sup>-5</sup>) of electron density for O3-H3...O5<sup>ii</sup>.

| contact                                          | D...A [Å] | D-H [Å]  | H...A [Å] | <O2-H2...O4 <sup>i</sup> | $\rho$ [eÅ <sup>-3</sup> ] |
|--------------------------------------------------|-----------|----------|-----------|--------------------------|----------------------------|
| O4-H4...O1 <sup>iii</sup><br>iii=1-x, y+0.5, 1-z | 2.8579(4) | 0.976(7) | 1.905(8)  | 164.7(7)                 | 0.17(7)                    |

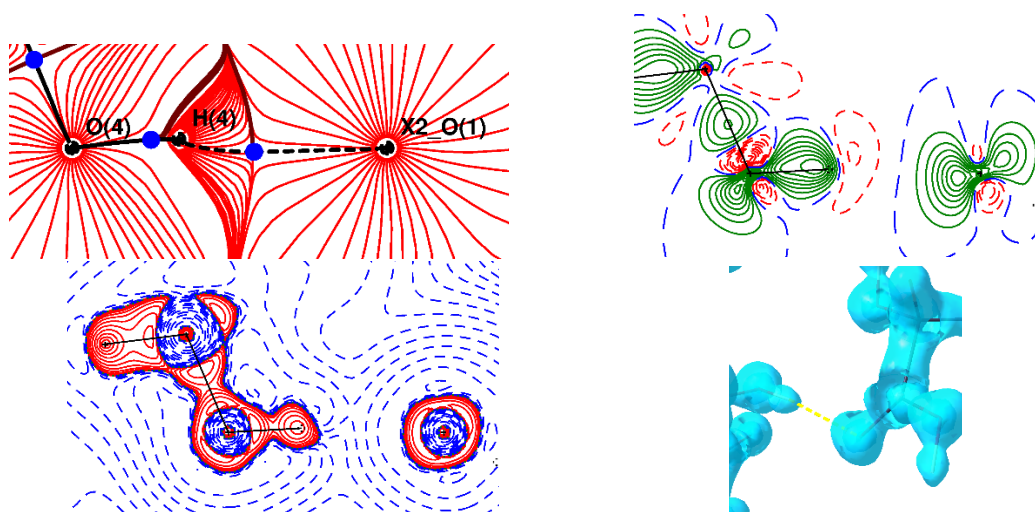

**Figure S8** Gradient trajectory plot, deformation density (contour lines at 0.1 eÅ<sup>-3</sup>) and Laplacian (isosurface at -2 eÅ<sup>-5</sup>) of electron density for O4-H4...O1<sup>iii</sup>.

| contact                                  | D...A [Å] | D-H [Å]  | H...A [Å] | <O2-H2...O4 <sup>i</sup> | $\rho$ [eÅ <sup>-3</sup> ] |
|------------------------------------------|-----------|----------|-----------|--------------------------|----------------------------|
| O6-H6...O1 <sup>iv</sup><br>iv=x, y, 1+z | 2.6781(4) | 0.982(8) | 1.712(8)  | 167.2(8)                 | 0.26(10)                   |

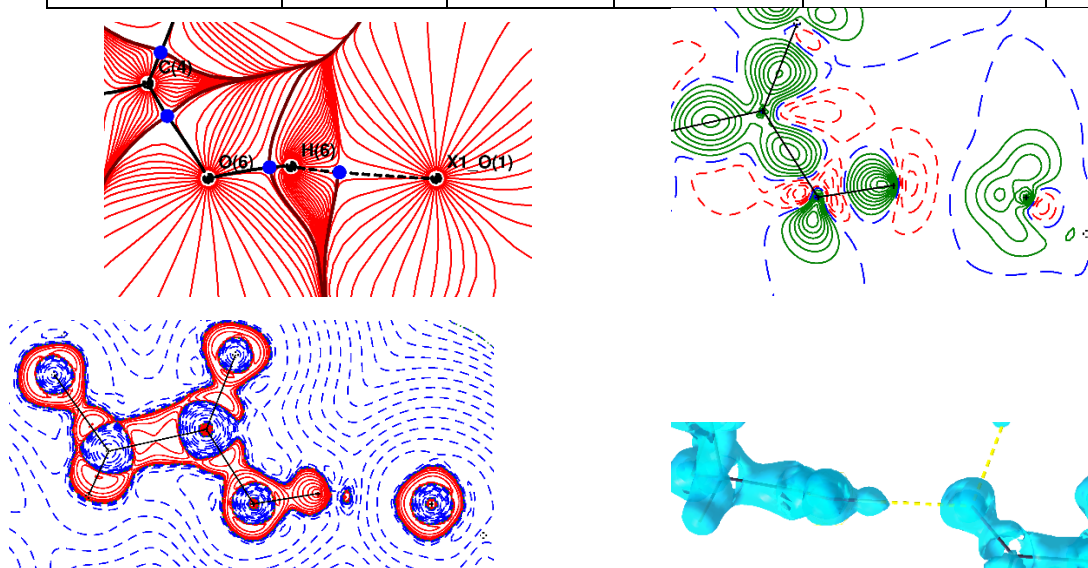

**Figure S9** Gradient trajectory plot, deformation density (contour lines at 0.1 eÅ<sup>-3</sup>) and Laplacian (isosurface at -2 eÅ<sup>-5</sup>) of electron density for O6-H6...O1<sup>iv</sup>.

| contact                                       | D...A [Å] | D-H [Å]  | H...A [Å] | <O2-H2...O4 <sup>i</sup> | $\rho$ [eÅ <sup>-3</sup> ] |
|-----------------------------------------------|-----------|----------|-----------|--------------------------|----------------------------|
| C3-H3A...O6 <sup>v</sup><br>v=2-x, y+0.5, 2-z | 3.0607(5) | 1.083(9) | 2.497(10) | 111.2(7)                 | 0.064(3)                   |

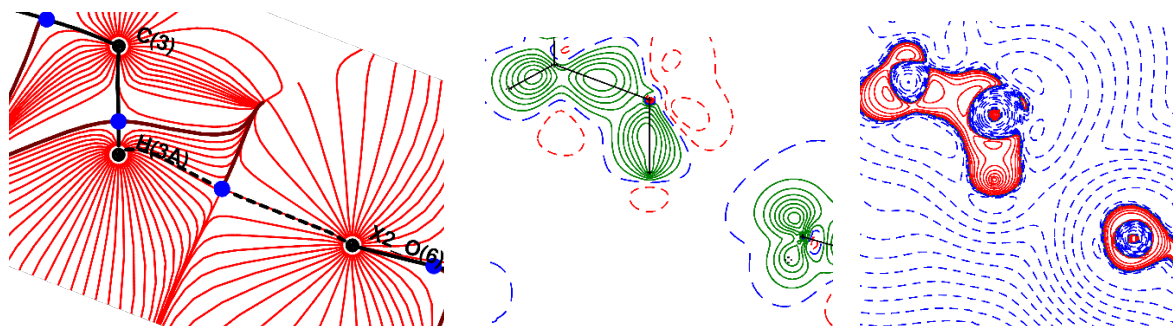

**Figure S10** Gradient trajectory plot, deformation density (contour lines at 0.1 eÅ<sup>-3</sup>) and Laplacian (isosurface at -2 eÅ<sup>-5</sup>) of electron density for C3-H3A...O6<sup>v</sup>.

**Table S11** Topological properties of (3,-1) critical points for covalent bonds in **1**.

| Bond   | $R_{ij}$ (Å) | $d_1$ (Å) | $\rho$ (e·Å <sup>-3</sup> ) | $\nabla^2\rho$ (e·Å <sup>-5</sup> ) |
|--------|--------------|-----------|-----------------------------|-------------------------------------|
| O1—C1  | 1.2182       | 0.8203    | 2.82(3)                     | -2.3(2)                             |
| O2—C1  | 1.3134       | 0.8739    | 2.46(3)                     | -26.5(2)                            |
| O2—H2  | 0.9844       | 0.7405    | 2.4(2)                      | -52.3(9)                            |
| O3—C2  | 1.4004       | 0.8552    | 2.06(3)                     | -21.0(2)                            |
| O3—H3  | 0.9850       | 0.7220    | 2.6(2)                      | -50.4(9)                            |
| O4—C3  | 1.4105       | 0.8694    | 1.96(3)                     | -24.7(2)                            |
| O4—H4  | 0.9844       | 0.7256    | 2.6(2)                      | -43.5(9)                            |
| O5—C4  | 1.2108       | 0.8124    | 2.91(4)                     | -6.3(3)                             |
| O6—C4  | 1.3187       | 0.8755    | 2.39(3)                     | -26.4(2)                            |
| O6—H6  | 0.9856       | 0.7246    | 2.5(2)                      | -45.5(9)                            |
| C1—C2  | 1.5193       | 0.8289    | 1.89(3)                     | -17.74(7)                           |
| C1—H2  | 2.0046       | 1.7607    | 2.4(2)                      | -52.3(9)                            |
| C2—C3  | 1.5474       | 0.7710    | 1.77(3)                     | -14.64(8)                           |
| C2—H2A | 1.0833       | 0.7262    | 1.9(2)                      | -20.9(5)                            |
| C3—C4  | 1.5211       | 0.7149    | 1.81(3)                     | -19.08(7)                           |
| C3—H3A | 1.0830       | 0.7378    | 2.0(2)                      | -21.4(5)                            |
| C4—H6  | 1.9875       | 1.7265    | 2.5(2)                      | -45.5(9)                            |

**Figs. S11 - S13** show the residual electron density distribution for **1**.

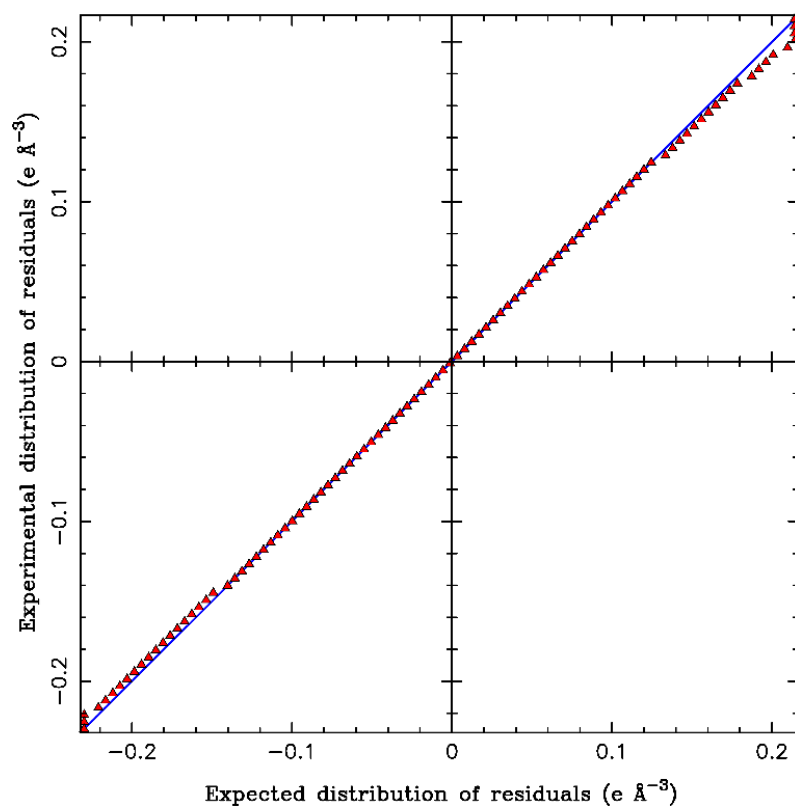

**Figure S11** Normal probability plot for residuals in the electron density in **1**.

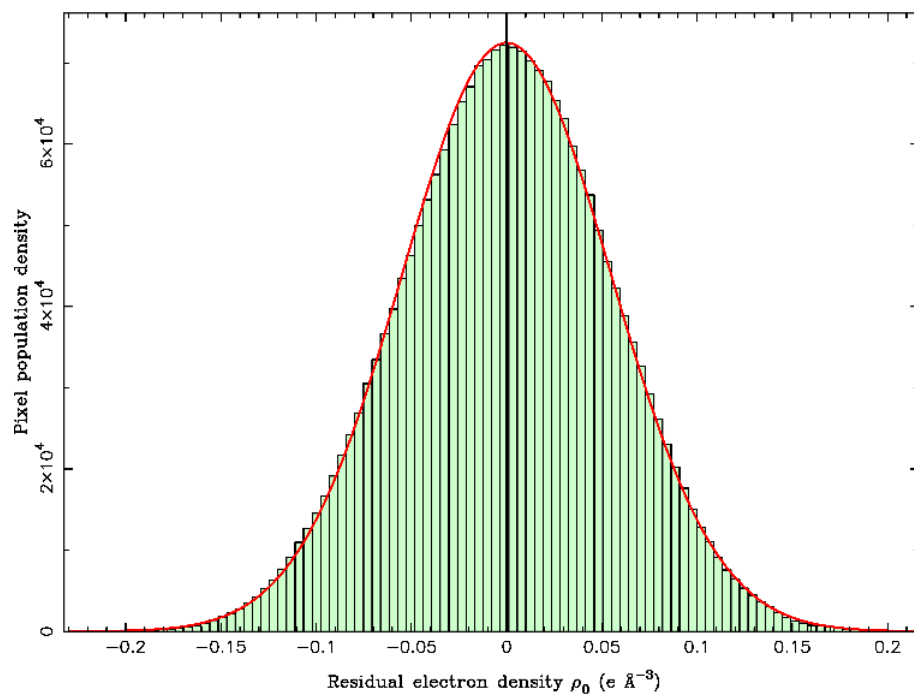

**Figure S12** Probability distribution histogram for residuals in the electron density in **1**.

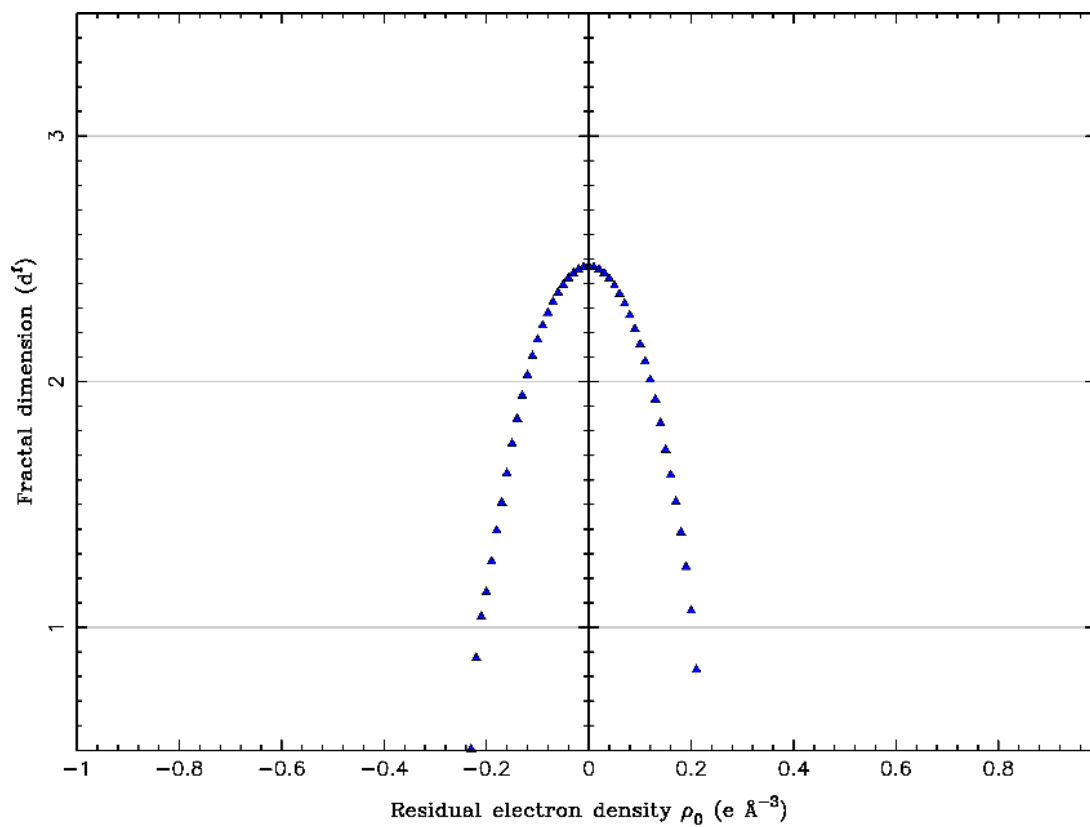

**Figure S13** Fractal dimension plot for residuals in the electron density in **1**.

**Figure S14** PEANUT plots of differences

ADPs (experiment, MM based) - ADPs (calculated, quasi-harmonic approximation)

Differences are scaled by a factor of 2 (top) and 4 (bottom), blue positive, red negative.

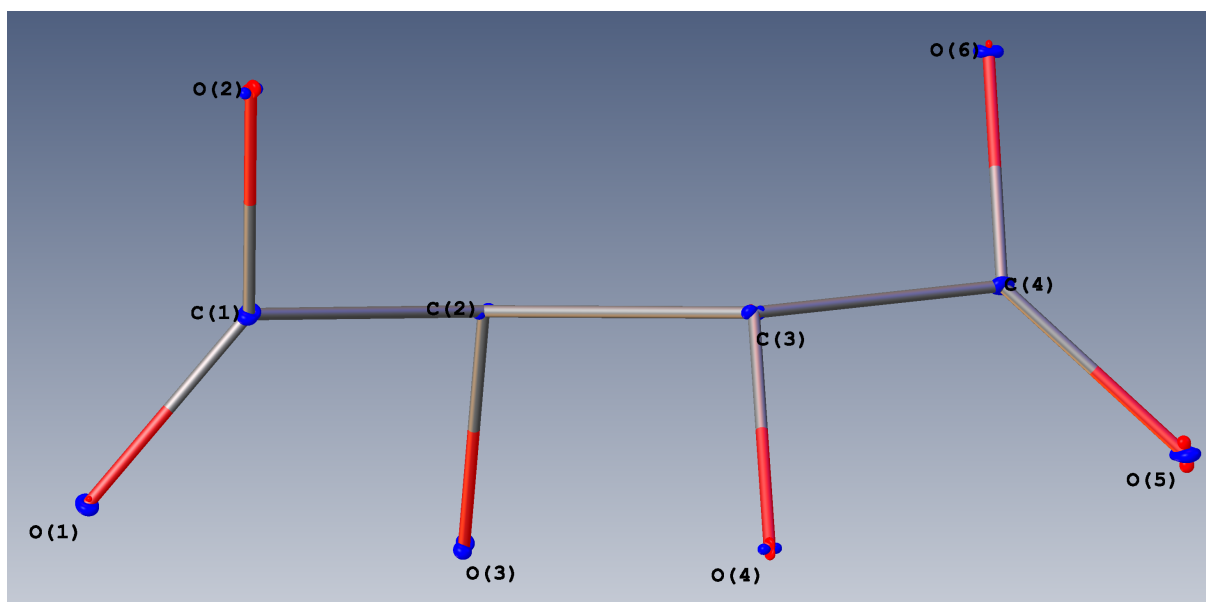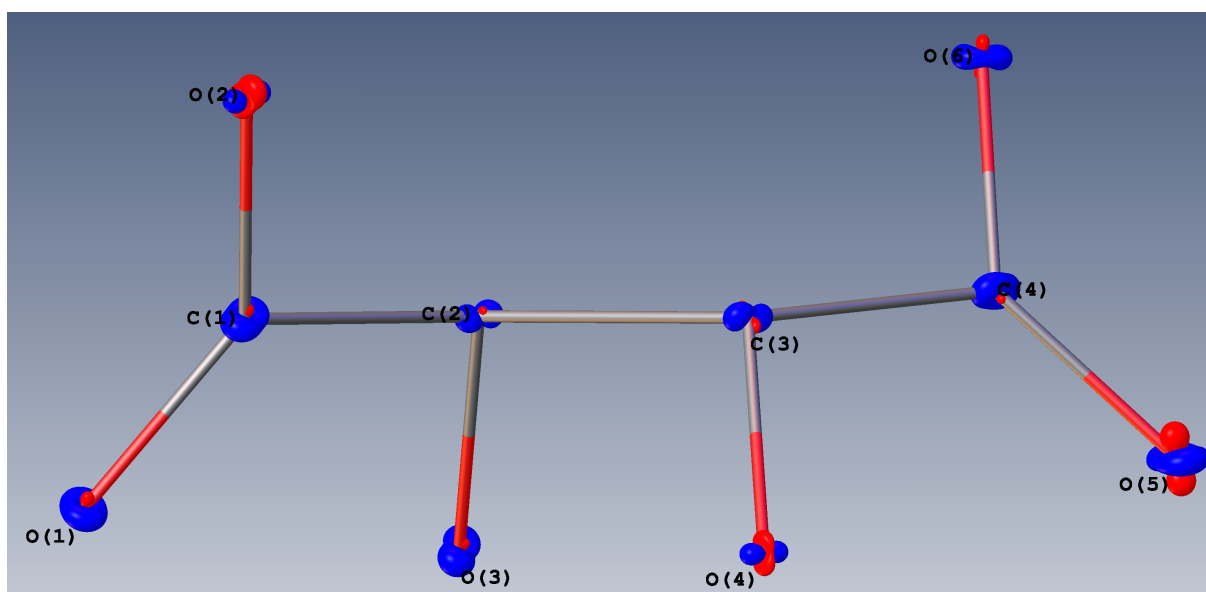

Supplement: d0ce01425g1.pdf [file d0ce01425g1.pdf]
